# Supplementary material
Source: PubMed Central journal article supplement (PMC1315897)
Supplement: 4-embor769-s1.pdf [file 4-embor769-s1.pdf]

Supplementary data

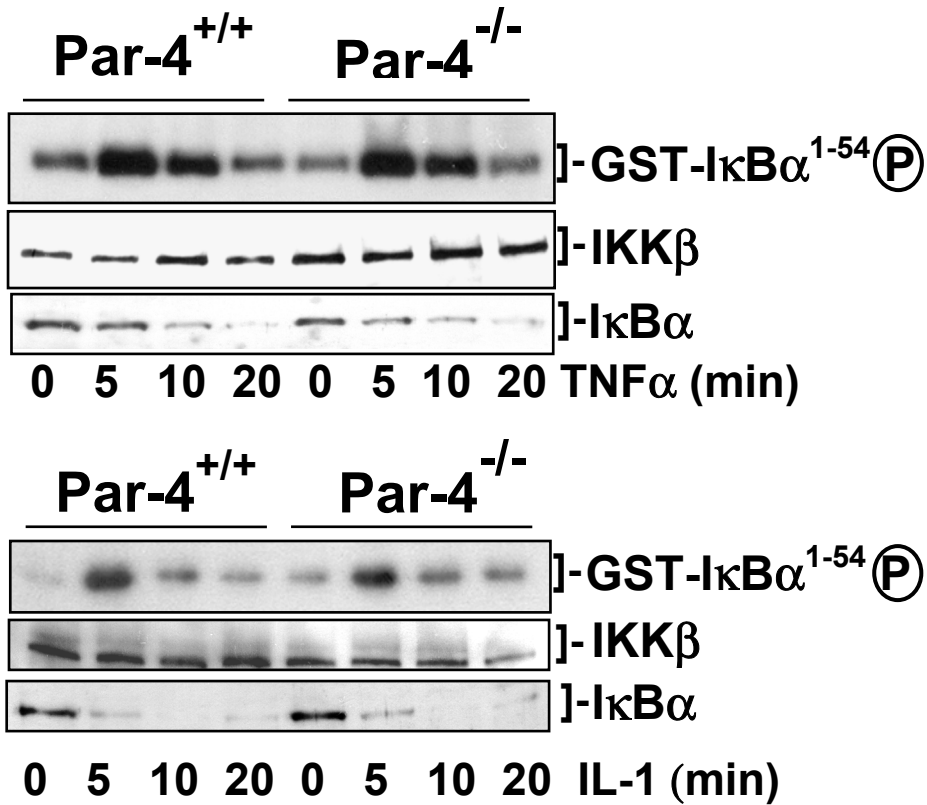

Supplementary figure 1

EFs were stimulated with 10 ng/ml of either TNF $\alpha$  (upper panel) or with 5 ng/ml of IL-1 (lower panel) for different times after which cell extracts were prepared and IKK activity was determined in immunoprecipitates of IKK $\gamma$  as described previously (Leitges et al., 2001). Also, the amount of IKK $\beta$  immunoprecipitated was determined with an anti-IKK $\beta$  antibody and the degradation of I $\kappa$ B $\alpha$  was determined by immunoblotting of extracts with an anti-I $\kappa$ B $\alpha$  antibody. This is a representative experiment of another two with similar results.

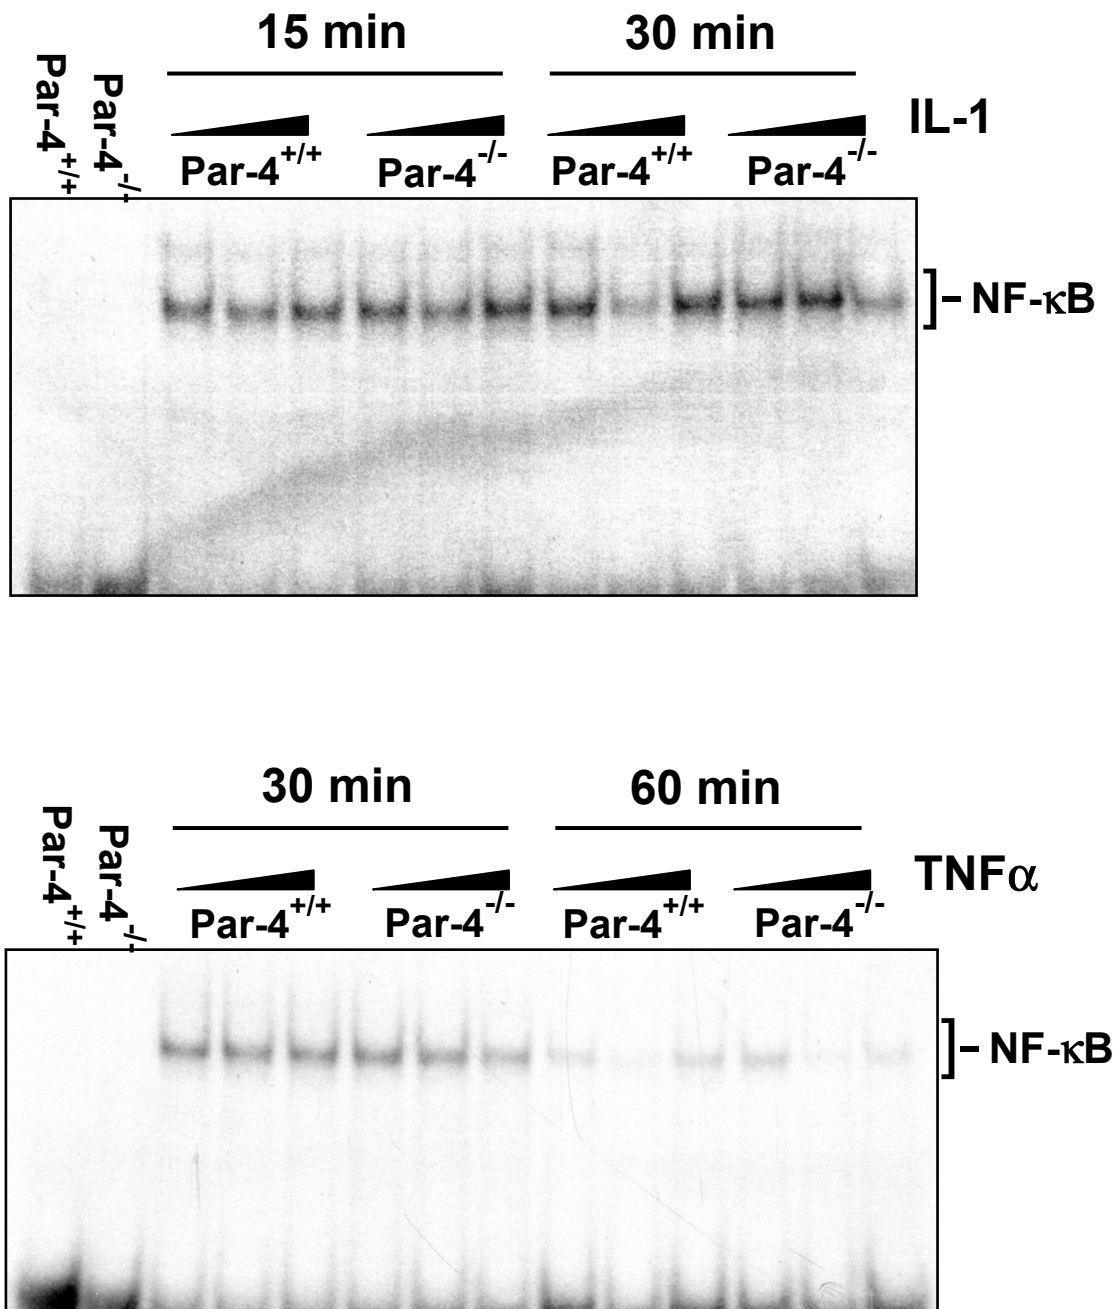

Supplementary figure 2

EFs were stimulated with different concentrations of either TNFα (5, 10 and 20 ng/ml; lower panel) or IL-1 (1, 5 and 10 ng/ml; upper panel) for different times after which nuclear cell extracts were prepared and electrophoretic mobility shift assays were determined as previously described (Leitges et al., 2001). This is a representative experiment of another two with similar results.

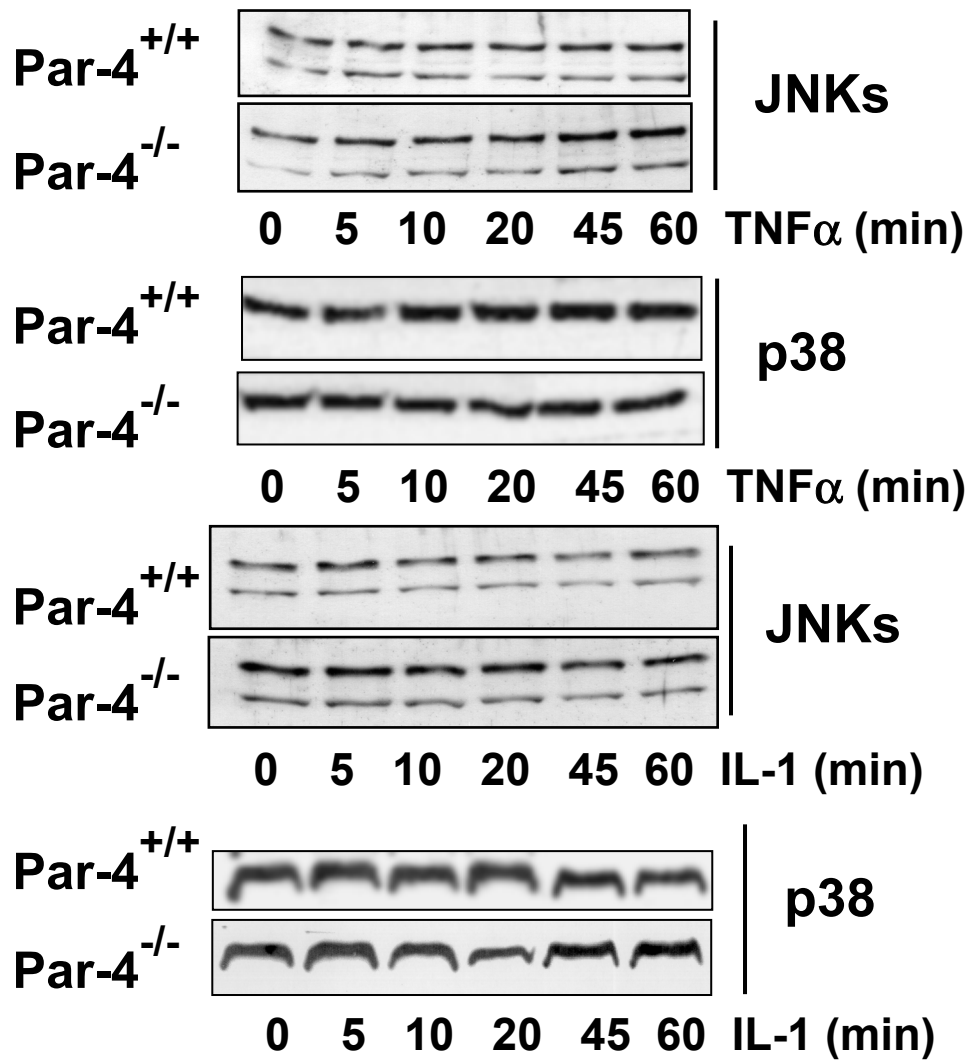

Supplementary figure 3

Extracts from the experiments of Fig. 4 were analyzed by immunoblotting with anti-JNK and anti-p38 antibodies.

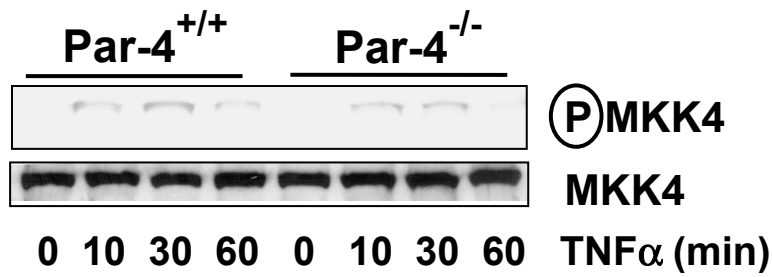

Supplementary figure 4

Extracts from EFs either wild type or Par-4<sup>-/-</sup> that had been stimulated or not with TNF $\alpha$  (20 ng/ml) for different times, were analyzed by immunoblotting with an anti-phospho-MKK4 antibody or an anti-MKK4 antibody. These are representative experiments of another two with similar results.

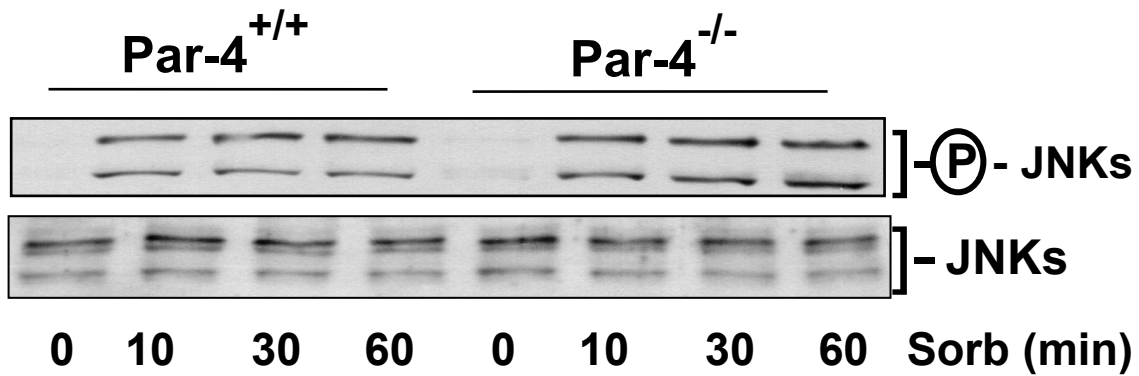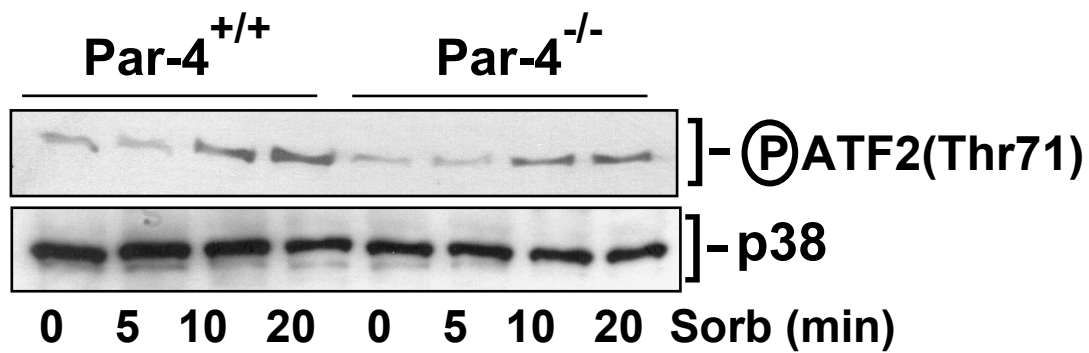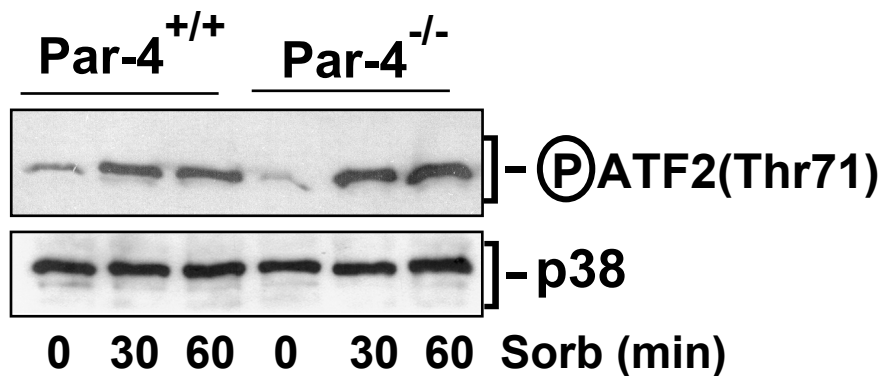

Supplementary figure 5

EFs either wild type or *Par-4*<sup>-/-</sup> were stimulated with sorbitol (0.6 M) for different times, after which cell extracts were analyzed by immunoblotting with an anti phospho-JNK antibody (upper panel). Extracts were also immunoprecipitated with an anti-p38 antibody and p38 activity was determined. The levels of JNKs and p38 are shown as control. These are representative experiments of another two with similar results.

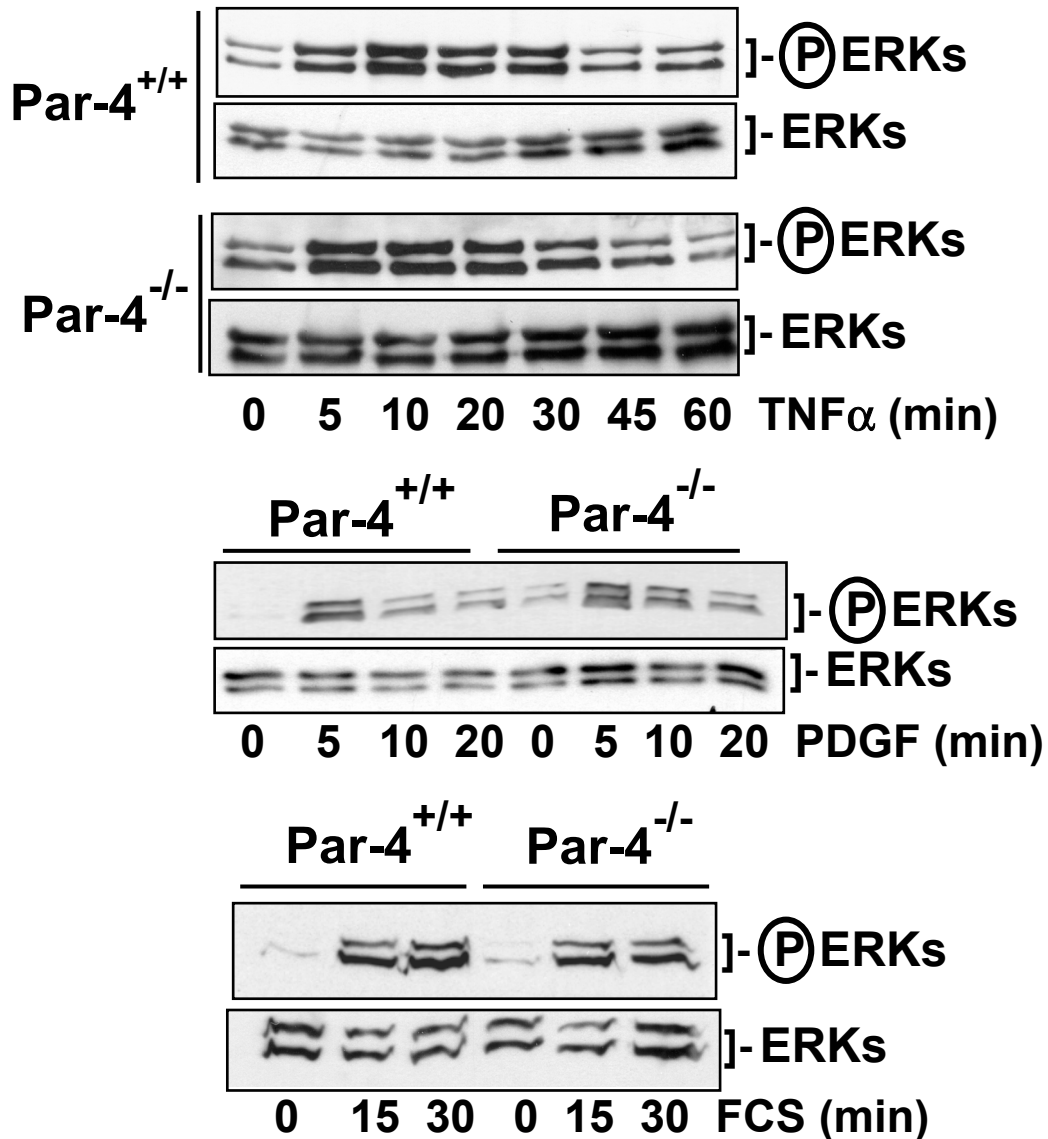

Supplementary figure 6

EFs either wild type or Par-4<sup>-/-</sup> were stimulated either with 10 ng/ml TNF $\alpha$  (upper panel), 50 ng/ml PDGF (middle panel), or fetal calf serum (FCS; lower panel) for different times, after which cell extracts were analyzed by immunoblotting with an anti phospho-ERK antibody. The levels of ERKs are shown as control. These are representative experiments of another two with similar results.

## References

Leitges, M., Sanz, L., Martin, P., Duran, A., Braun, U., Garcia, J.F., Camacho, F., Diaz-Meco, M.T., Rennert, P.D. and Moscat, J. (2001) Targeted Disruption of the zetaPKC Gene Results in the Impairment of the NF-kappaB Pathway. *Mol Cell*, **8**, 771-780.
